# Supplementary figures and images for: Effect of Alkali Atom Doping on the Electronic Structure and Aromatic Character of Planar and Quasi-Planar Al13+&nbsp;Clusters
Source: Research Square preprint supplement (doi:10.21203/rs.3.rs-245868/v1), 2021-03-10

Graphical Abstract


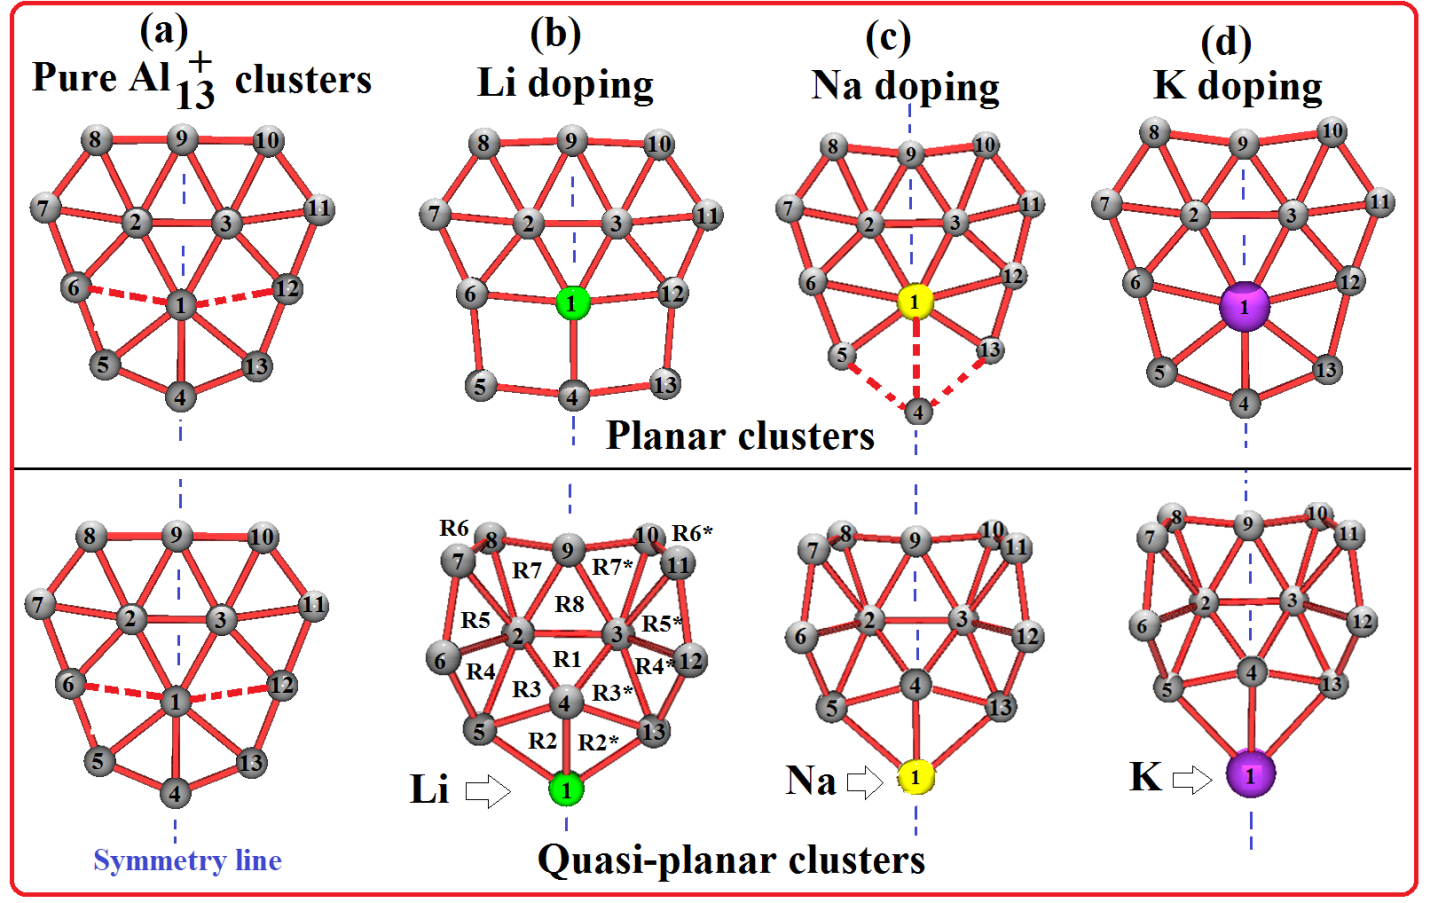


Effect of alkali atom doping to Al13+ cluster

Supplement: Supplementary file 1 [file 234e24ed5fc61dc145e35560.docx]
